# Supplementary material for: Efficacy of Traditional Chinese Medicine in Treatment and Prophylaxis of Radiation-Induced Oral Mucositis in Patients Receiving Radiotherapy: A Randomized Controlled Trial
Source: PubMed Central journal article supplement — Integr Cancer Ther. 2017 Sep 4;17(2):444–50. doi: 10.1177/1534735417725578 (PMC6041911; doi:10.1177/1534735417725578), 2017-09-04
Supplement: Supplementary_documents.pdf [file Supplementary_documents.pdf]

---

**Supplementary documents:**

**The quantitative, qualitative and preparation of the traditional Chinese herbs granules used in this study**

**Rheum palmatum L.**

**Characters:** Yellow to yellow brown particles; slight smell, bitter taste, slightly astringent.

**Preparation:** rhubarb 30kg were added water for decoction for one hour for two times. Then the mixture were filtered to obtain the solution. The solution was condensed to a relative density of 1.06-1.08 (60℃) for spray drying. Add a proper amount of maltodextrin, mix to obtain granulation. The final weight of granule is 10kg.

**Process:** The product was processed according to the relevant standard of Rheum palmatum L. processing of Chinese Pharmacopoeia (2015) Volume I .

**Examination:** Consistent with the provisions of the relevant provisions of granules (Chinese Pharmacopoeia 2015 edition of the four general rules of the 0104)

**Glycyrrhiza uralensis Fisch.**

**Characters:** yellow brown particles; slight smell, sweet taste.

**Preparation:** Licorice 30kg were added water for decoction for one hour for two times. Then the mixture were filtered to obtain the solution. The solution was condensed to a relative density of 1.13-1.15 (60℃) for spray drying. Add a proper amount of maltodextrin, mix to obtain granulation. The final weight of granule is 5kg.

**Process:** The product was processed according to the relevant standard of Glycyrrhiza uralensis Fisch processing of Chinese Pharmacopoeia (2015) Volume I .

**Examination:** Consistent with the provisions of the relevant provisions of granules (Chinese Pharmacopoeia 2015 edition of the four general rules of the 0512)

**Mentha haplocalyx Briq.**

**Characters:** Brownish yellow to brown granules; fragrance, pungent and cool

**Preparation:** Mint 60kg were added water for decoction for one hour for two times. Then the mixture were filtered to obtain the solution. The solution was condensed to a relative density of 1.13-1.15 (60℃) for spray drying. Add a proper amount of maltodextrin, mix to obtain granulation. The final weight of granule is 5kg.

**Process:** The product was processed according to the relevant standard of Mentha haplocalyx Briq processing of Chinese Pharmacopoeia (2015) Volume I .

**Examination:** Consistent with the provisions of the relevant provisions of granules (Chinese Pharmacopoeia 2015 edition of the four general rules of the 0104)

**Scutellaria baicalensis Georgi.**

**Characters:** Yellow to yellow brown particles; micro gas, bitter taste

**Preparation:** Baikal Skullcap 10kg were added water for decoction for one hour for two times. Then the mixture were filtered to obtain the solution. The solution was condensed to a relative density of 1.15-1.17 (60℃) for spray drying. Add a proper amount of maltodextrin, mix to obtain granulation. The final weight of granule is 2kg.

**Process:** The product was processed according to the relevant standard of Scutellaria baicalensis processing of Chinese Pharmacopoeia (2015) Volume I .

---

**Examination:** Consistent with the provisions of the relevant provisions of granules (Chinese Pharmacopoeia 2015 edition of the four general rules of the 0512)

**Ophiopogon japonicus (L.f) Ker-Gawl**

**Characters:** White to light yellow particles; micro gas, sweet taste.

**Preparation:** Ophiopogon japonicus 10kg were added water for decoction for one hour for two times. Then the mixture were filtered to obtain the solution. The solution was condensed to a relative density of 1.03-1.05 (60℃) for spray drying. Add a proper amount of maltodextrin, mix to obtain granulation. The final weight of granule is 3kg.

**Process:** The product was processed according to the relevant standard of Ophiopogon japonicus processing of Chinese Pharmacopoeia (2015) Volume I .

**Examination:** Consistent with the provisions of the relevant provisions of granules (Chinese Pharmacopoeia 2015 edition of the four general rules of the 0104)

**Paeonia lactiflora Pall.**

**Characters:** Light brown to dark brown granules; micro gas, slightly bitter taste.

**Preparation:** herbaceous peony 20kg were added water for decoction for one hour for two times. Then the mixture were filtered to obtain the solution. The solution was condensed to a relative density of 1.03-1.05 (60℃) for spray drying. Add a proper amount of maltodextrin, mix to obtain granulation. The final weight of granule is 3kg.

**Process:** The product was processed according to the relevant standard of Paeonia lactiflora Pall processing of Chinese Pharmacopoeia (2015) Volume I .

**Examination:** Consistent with the provisions of the relevant provisions of granules (Chinese Pharmacopoeia 2015 edition of the four general rules of the 0104)

**Pheretima aspergillum (E.Perrier)**

**Characters:** Pale yellow to brownish yellow granules, gas fishy, taste salty.

**Preparation:** herbaceous peony 10kg were added water for decoction for one hour for two times. Then the mixture were filtered to obtain the solution. The solution was condensed to a relative density of 1.07-1.09 (60℃) for spray drying. Add a proper amount of maltodextrin, mix to obtain granulation. The final weight of granule is 1kg.

**Process:** The product was processed according to the relevant standard of Pheretima aspergillum processing of Chinese Pharmacopoeia (2015) Volume I .

**Examination:** Consistent with the provisions of the relevant provisions of granules (Chinese Pharmacopoeia 2015 edition of the four general rules of the 0104)

**Scrophularia ningpoensis Hemsl.**

**Characters:** Light brown to brown particles; gas micro, taste slightly sweet, slightly bitter.

**Preparation:** Scrophularia 10kg were added water for decoction for one hour for two times. Then the mixture were filtered to obtain the solution. The solution was condensed to a relative density of 1.09-1.11 (60℃) for spray drying. Add a proper amount of maltodextrin, mix to obtain granulation. The final weight of granule is 3kg.

**Process:** The product was processed according to the relevant standard of Scrophularia processing of Chinese Pharmacopoeia (2015) Volume I .

---

**Examination:** Consistent with the provisions of the relevant provisions of granules (Chinese Pharmacopoeia 2015 edition of the four general rules of the 0104)

**Forsythia suspensa (Thunb.) Vahl.**

**Characters:** brownish yellow to yellowish brown particle; a delicate fragrance, bitter taste.

**Preparation:** Forsythia 20kg were added water for decoction for one hour for two times. Then the mixture were filtered to obtain the solution. The solution was condensed to a relative density of 1.09-1.11 (60°C) for spray drying. Add a proper amount of maltodextrin, mix to obtain granulation. The final weight of granule is 1kg.

**Process:** The product was processed according to the relevant standard of Forsythia suspense processing of Chinese Pharmacopoeia (2015) Volume I .

**Examination:** Consistent with the provisions of the relevant provisions of granules (Chinese Pharmacopoeia 2015 edition of the four general rules of the 0104)

**Dryopteris crassirhizoma Nakai.**

**Characters:** Brownish red to brown particles; gas slightly bitter taste, slightly astringent.

**Preparation:** Aspidium 30kg were added water for decoction for one hour for two times. Then the mixture were filtered to obtain the solution. The solution was condensed to a relative density of 1.09-1.11 (60°C) for spray drying. Add a proper amount of maltodextrin, mix to obtain granulation. The final weight of granule is 1kg.

**Process:** The product was processed according to the relevant standard of Dryopteris crassirhizoma Nakai processing of Chinese Pharmacopoeia (2015) Volume I .

**Examination:** Consistent with the provisions of the relevant provisions of granules (Chinese Pharmacopoeia 2015 edition of the four general rules of the 0104)
